# Supplementary material for: Lithium-ion transport in inorganic active fillers used in PEO-based composite solid electrolyte sheets
Source: Royal Society of Chemistry journal article supplement (doi:10.1039/d1ra06210g), 2021-01-01
Supplement: d1ra06210g1.pdf [file d1ra06210g1.pdf]

## Supporting Information

### **Lithium-ion transport in inorganic active fillers used in PEO-based composite solid electrolyte sheets**

Young-Woong Song <sup>a,b</sup>, Kookjin Heo<sup>a,b</sup>, Jonggwan Lee<sup>a</sup>, Dahee Hwang <sup>a,b</sup>, Min-Young Kim<sup>a</sup>,  
Su-jin Kim<sup>a</sup>, Jaekook Kim<sup>b</sup>, and Jinsub Lim<sup>a,\*</sup>

<sup>a</sup> *Korea Institute of Industrial Technology (KITECH), 6, Cheomdan-gwagiro 208-gil, Buk-gu, Gwangju 61012, Republic of Korea*

<sup>b</sup> *Department of Materials Science and Engineering, Chonnam National University, 300 Yongbongdong, Bukgu, Gwangju 61186, Republic of Korea*

\*Corresponding author. Tel.: +82-62-600-6430; fax: +82-62-600-6179.

E-mail address: [jinsub@kitech.re.kr](mailto:jinsub@kitech.re.kr) (J. Lim)

Figure S1. FE-SEM image and particle size distribution exhibited by milling-30min and milling-80min (a) and (b)

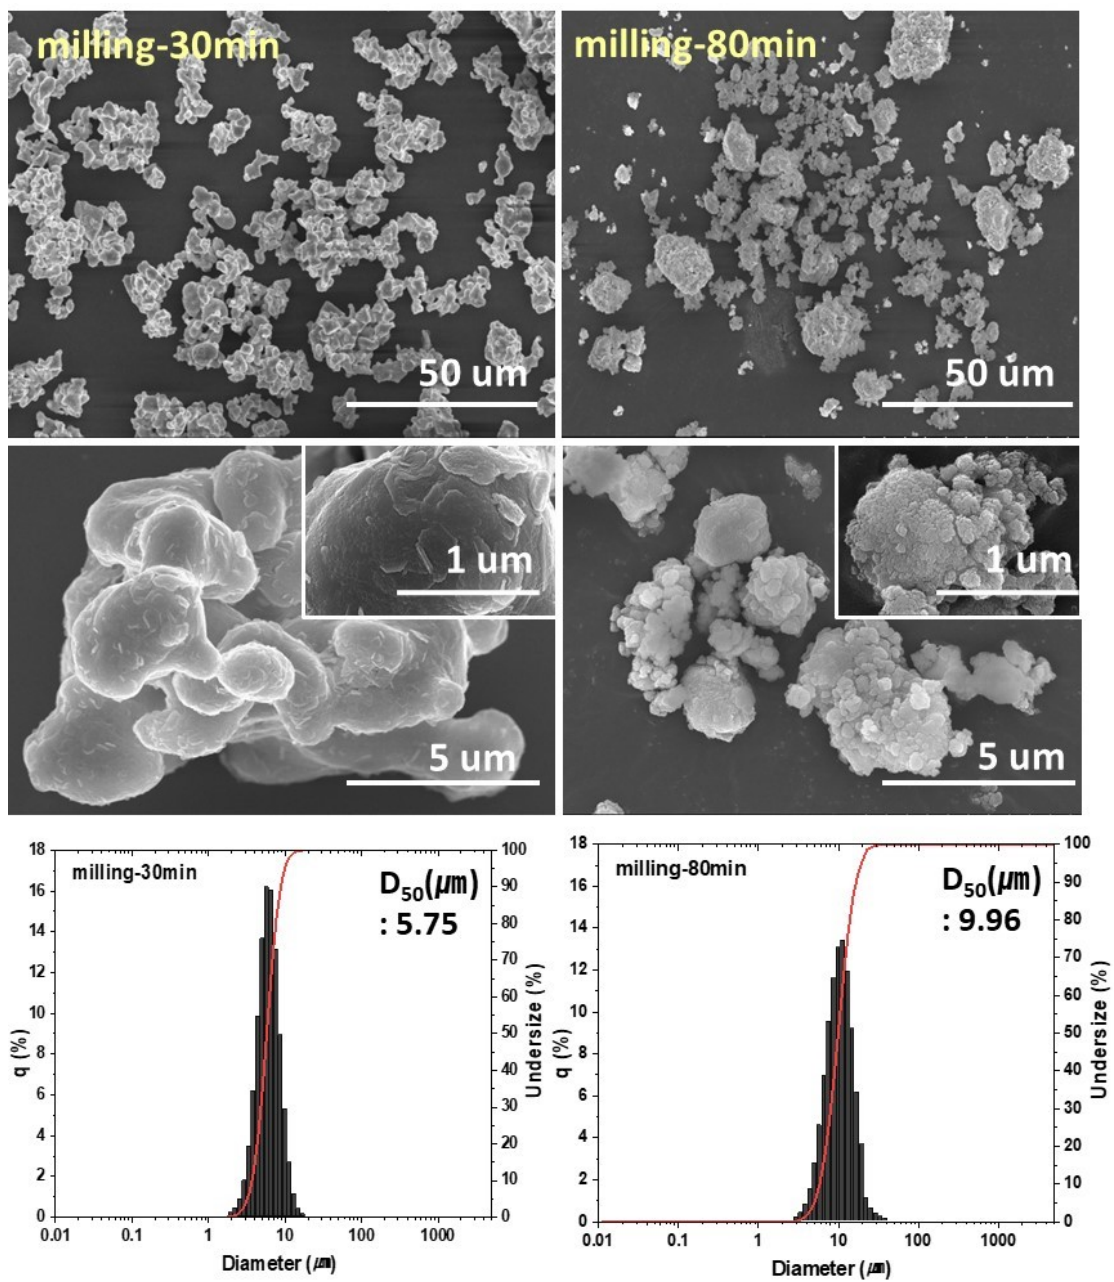

Figure S2. FE-SEM and EDX mapping images of LLZTO CSE and BM-LLZTO CSE

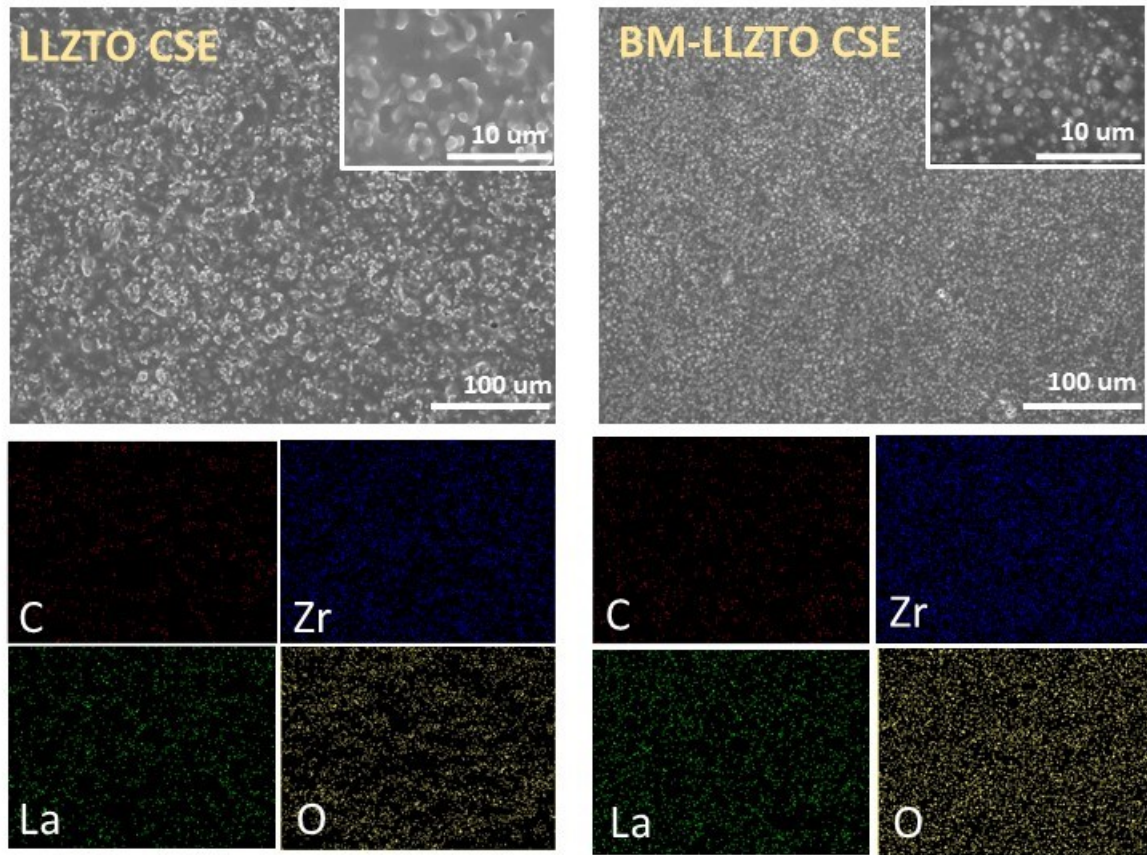

Figure S3. Stress–strain curves of PEO-Li salt and BM-LLZTO CSE

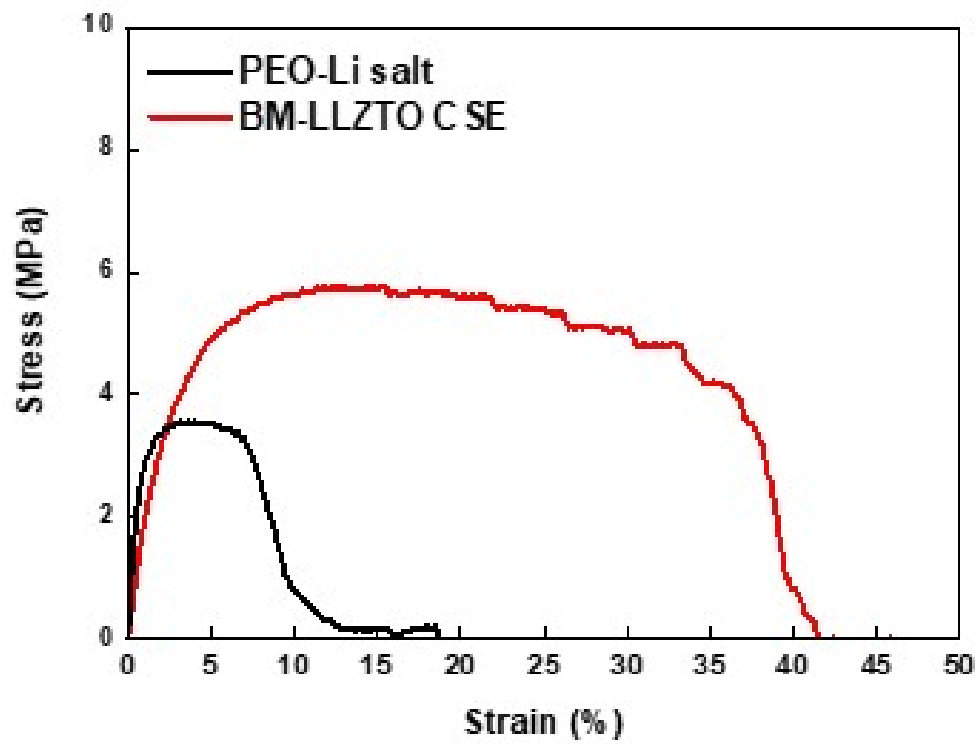

Figure S4. Current evolution under a polarization voltage of 10 mV milling-30min and milling-80min (a) and (b), total ionic conductivity, Lithium ionic conductivity and Lithium transference number curves at 70°C according to milling time

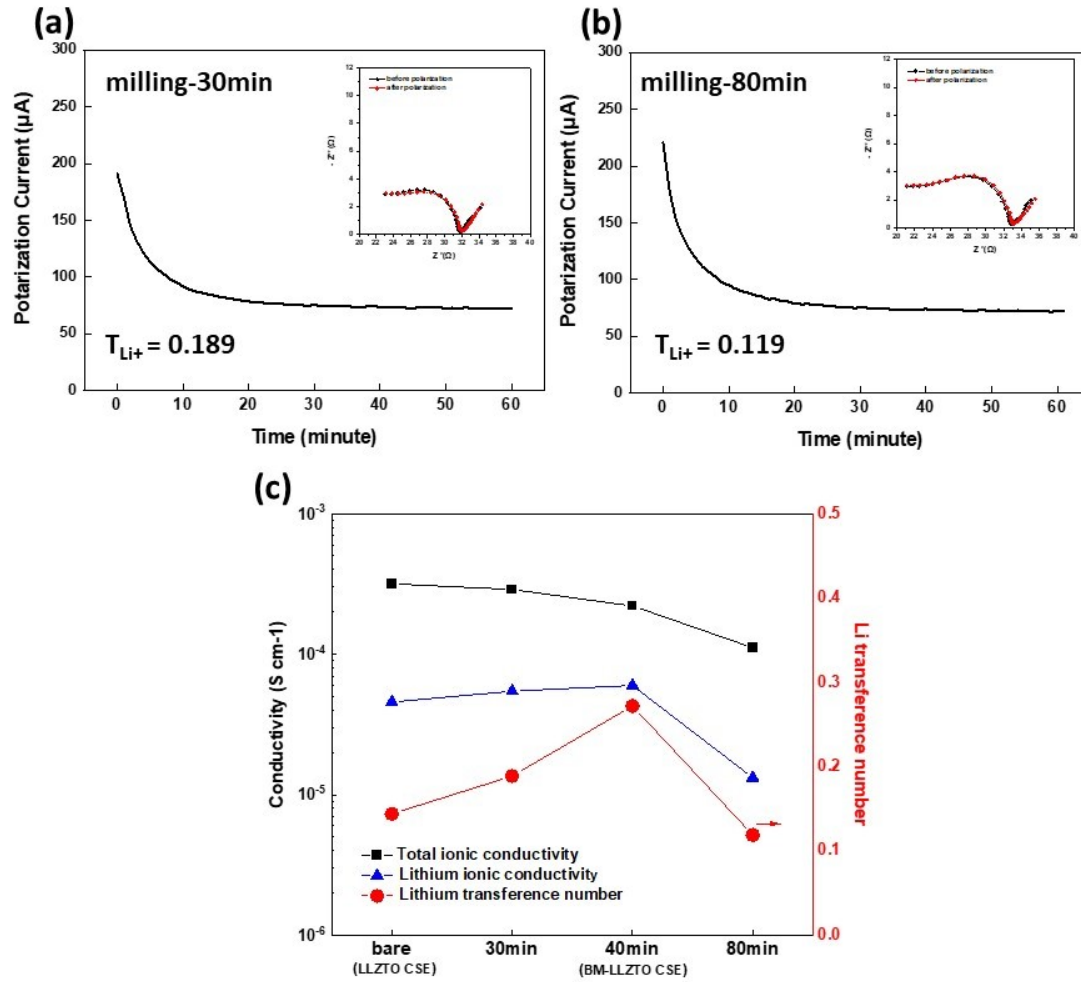

Figure S5. Characteristics comparisons of “Polymer-in-ceramic” CSE.

| Composition of CSE                                                                                            |             | Active material                                                        | $\sigma_{\text{total}}$<br>(S cm <sup>-1</sup> ) | T <sub>Li+</sub> | Potential range<br>(V) | Capacity<br>(mAh g <sup>-1</sup> ) | Ref       |
|---------------------------------------------------------------------------------------------------------------|-------------|------------------------------------------------------------------------|--------------------------------------------------|------------------|------------------------|------------------------------------|-----------|
| Solid electrolyte                                                                                             | Polymer     |                                                                        |                                                  |                  |                        |                                    |           |
| BM-LLZTO CSE<br>(Li <sub>6.4</sub> La <sub>3</sub> Zr <sub>1.4</sub> Ta <sub>0.6</sub> O <sub>12</sub> 70wt%) | PEO         | LiFePO <sub>4</sub>                                                    | 2.2 × 10 <sup>-4</sup><br>(70°C)                 | 0.272            | 5.0                    | 153.3 (80 μm)<br>144.4 (60 μm)     | This work |
| CSPE0<br>(Al-doped Li <sub>5.5</sub> La <sub>3</sub> Zr <sub>2</sub> O <sub>12</sub> 70wt%)                   | PEO         | LiNi <sub>0.6</sub> Co <sub>0.2</sub> Mn <sub>0.2</sub> O <sub>2</sub> | 8.5 × 10 <sup>-5</sup><br>(60°C)                 | 0.290            | 5.2                    | 121 (160 μm)                       | [S1]      |
| Li <sub>6.4</sub> La <sub>3</sub> Zr <sub>1.4</sub> Ta <sub>0.6</sub> O <sub>12</sub><br>(80wt%)              | PEO/PE<br>G | LiFePO <sub>4</sub>                                                    | 5.2 × 10 <sup>-4</sup><br>(80°C)                 | -                | 5.0                    | 127.7 (100 μm)                     | [24]      |
| Li <sub>6.4</sub> La <sub>3</sub> Zr <sub>1.4</sub> Ta <sub>0.6</sub> O <sub>12</sub><br>(20/80/20vol%)       | PEO         | LiFePO <sub>4</sub>                                                    | 9.1 × 10 <sup>-5</sup><br>(55°C)                 | -                | 5.0                    | 118.6 (N/A)                        | [S2]      |
| LAGP-70<br>(Li <sub>1.3</sub> Al <sub>0.5</sub> Ge <sub>1.5</sub> (PO <sub>4</sub> ) <sub>3</sub> 70wt%)      | PBA         | LiNi <sub>0.6</sub> Co <sub>0.2</sub> Mn <sub>0.2</sub> O <sub>2</sub> | 2.0 × 10 <sup>-4</sup><br>(65°C)                 | -                | 4.9                    | 169.5 (N/A)                        | [S3]      |

[S1] J. H. Cha, P. N. Didwal, J. M. Kim, D. R. Chang and C. J. Park, *Journal of Membrane Science*, 2020, **595** 117538, DOI: [10.1016/j.memsci.2019.117538](https://doi.org/10.1016/j.memsci.2019.117538)

[S2] H. Huo, Y. Chen, J. Luo, X. Yang, X. Guo and X. Sun, *Adv. Energy Mater.*, 2019, **9**, 1804004, DOI: [10.1002/aenm.201804004](https://doi.org/10.1002/aenm.201804004)

[S3] M. S. Park, Y. C. Jung and D. W. Kim, *Solid State Ionics*, 2018, **315**, 65–70, DOI: [10.1016/j.ssi.2017.12.007](https://doi.org/10.1016/j.ssi.2017.12.007)
